1 **Identification and biochemical characterization of a novel PP2C-**  
2 **like Ser/Thr phosphatase in *E. coli***

3

4 Krithika Rajagopalan and Jonathan Dworkin\*

5 Department of Microbiology & Immunology, College of Physicians and Surgeons,

6 Columbia University, New York, NY 10032 USA

7

8 \*Mailing address: 701 W. 168th St., Room 1218, New York, NY 10032

9 T: 212.342.3731, email: [jonathan.dworkin@columbia.edu](mailto:jonathan.dworkin@columbia.edu)

10

11 **Keywords: Ser/Thr phosphorylation, metal-dependent phosphatase**

12

13

14

## 15 **Abstract**

16 In bacteria, signaling phosphorylation is thought to occur primarily on His and Asp  
17 residues. However, phosphoproteomic surveys in phylogenetically diverse bacteria over  
18 the past decade have identified numerous proteins that are phosphorylated on Ser and/or  
19 Thr residues. Consistently, genes encoding Ser/Thr kinases are present in many bacterial  
20 genomes such as *E. coli*, which encodes at least three Ser/Thr kinases. Since Ser/Thr  
21 phosphorylation is a stable modification, a dedicated phosphatase is necessary to allow  
22 reversible regulation. Ser/Thr phosphatases belonging to several conserved families are  
23 found in bacteria. One family of particular interest are Ser/Thr phosphatases which have  
24 extensive sequence and structural homology to eukaryotic Ser/Thr PP2C phosphatases.  
25 These proteins, called eSTPs (eukaryotic-like Ser/Thr phosphatases), have been  
26 identified in a number of bacteria, but not in *E. coli*. Here, we describe a previously  
27 unknown eSTP encoded by an *E. coli* ORF, *yegK*, and characterize its biochemical  
28 properties including its kinetics, substrate specificity and sensitivity to known phosphatase  
29 inhibitors. We investigate differences in the activity of this protein in closely related *E. coli*  
30 strains. Finally, we demonstrate that this eSTP acts to dephosphorylate a novel Ser/Thr  
31 kinase which is encoded in the same operon.

32

## 33 **Importance**

34 Regulatory protein phosphorylation is a conserved mechanism of signaling in all biological  
35 systems. Recent phosphoproteomic analyses of phylogenetically diverse bacteria  
36 including the model Gram-negative bacterium *E. coli* demonstrate that many proteins are  
37 phosphorylated on serine or threonine residues. In contrast to phosphorylation on histidine  
38 or aspartate residues, phosphorylation of serine and threonine residues is stable and  
39 requires the action of a partner Ser/Thr phosphatase to remove the modification. Although  
40 a number of Ser/Thr kinases have been reported in *E. coli*, no partner Ser/Thr

41 phosphatases have been identified. Here, we biochemically characterize a novel Ser/Thr  
42 phosphatase that acts to dephosphorylate a Ser/Thr kinase that is encoded in the same  
43 operon.

## 44 **Introduction**

45 Reversible protein phosphorylation is an important regulatory mechanism in eukaryotes  
46 and prokaryotes (1). In eukaryotes, signaling phosphorylation typically occurs on serine,  
47 threonine or tyrosine residues and is mediated by the combined action of kinases and  
48 phosphatases. In prokaryotes, signaling phosphorylation has been thought to occur  
49 largely on histidine and aspartate residues mediated by histidine kinases of two-  
50 component systems (2). However, mass spectrometry based-phosphoproteomic analyses  
51 over past decade have identified numerous Ser/Thr/Tyr phosphorylated proteins in many  
52 bacteria (3-5), including *Escherichia coli* (6-9). Some of these phosphoproteins and the  
53 specific phosphosites are conserved in divergent species (7) suggesting that this  
54 regulation may be physiologically relevant.

55 Ser/Thr kinases from phylogenetically diverse bacteria have been described (5). For  
56 example, in *E. coli*, YeaG plays a role in nitrogen starvation (10), YihE is involved in the  
57 Cpx stress response (11) and cell death pathways (12) and HipA regulates bacterial  
58 persister formation by phosphorylating a tRNA synthetase (13, 14). However, both the  
59 authentic *in vivo* substrates of these kinases and/or their proximal activating stimuli are  
60 largely uncharacterized, complicating efforts to understand their precise physiological role.

61 Phosphorylation on serine or threonine residues is more stable than phosphorylation  
62 on histidine or aspartate residues and is subject to additional regulation by Ser/Thr  
63 phosphatases. Analysis of phylogenetically diverse bacterial genomes revealed the  
64 presence of genes encoding proteins (15-17) which bear significant resemblance to  
65 eukaryotic Ser/Thr PP2C phosphatases (17, 18) hence they are referred to as eukaryotic-  
66 like Ser/Thr phosphatases (eSTPs). Some of these proteins have been characterized  
67 biochemically and structurally, with these studies confirming their general similarity to their  
68 eukaryotic counterparts. Eukaryotic Ser/Thr protein phosphatases are divided into two  
69 classes, either phosphoprotein phosphatases (PPP) or metal dependent protein

70 phosphatases (PPM), according to structure, presence of signature motifs, metal ion  
71 dependence and sensitivity to inhibitors (19). PPM phosphatases require  $Mg^{2+}/Mn^{2+}$  to  
72 mediate dephosphorylation of phospho-serine or phospho-threonine residues. A well-  
73 studied member of the PPM phosphatase family is human protein phosphatase 2C (PP2C)  
74 (20) which bears a striking resemblance to bacterial PPM phosphatases. PPM/PP2C  
75 phosphatases are characterized by the presence of 11 signature motifs with 8 absolutely  
76 conserved residues (17, 19).

77 While several bacterial PPM-type phosphatases have been biochemically  
78 characterized (21-28), PPM-type phosphatases have not been identified in *E. coli* despite  
79 strong evidence of Ser/Thr phosphorylation. Here, we characterize a previously  
80 undescribed ORF, *yegK*, that is present in both *E. coli* B and K strains. This ORF encodes  
81 a ~28 kDa protein which bears sequence similarity to PP2C-type phosphatases. We  
82 designate this gene *pphC* and its protein product as PphC. Recombinant PphC was  
83 purified and its enzymatic properties characterized. Despite some differences in sequence  
84 conservation as compared to other bacterial eSTPs, PphC resembles PP2C-type  
85 phosphatases in various biochemical assays. Furthermore, we show that PphC  
86 dephosphorylates autophosphorylated YegI (a previously undescribed Ser/Thr kinase)  
87 which is encoded in the same operon as *pphC*. To our knowledge, this is the first report  
88 of the identification and biochemical characterization of an *E. coli* PP2C-like phosphatase.

89

## 90 **Results**

91

### 92 **YegK is an atypical PP2C-like phosphatase**

93 To identify PP2C-like phosphatases in *E. coli*, we performed a homology-based BLAST  
94 search using *Bacillus subtilis* PrpC, a well-characterized PP2C-like phosphatase (26), as  
95 the query. This analysis revealed a previously uncharacterized 762bp ORF, *yegK*, which

96 encodes a putative 253 amino acid polypeptide. Sequence analysis and domain prediction  
97 of YegK revealed that amino acids 11-232 have homology to a PP2C domain (Fig 2A).  
98 PP2C phosphatases include 11 conserved signature motifs (17, 29). Multiple sequence  
99 alignment of YegK with known PP2C phosphatases from other Gram-negative bacteria  
100 shows presence of these 11 motifs but with low overall sequence homology. However,  
101 unlike other bacterial PP2C homologs (22, 23, 25, 28, 30), YegK contains only six of the  
102 eight absolutely conserved residues that are involved in metal binding, coordination and  
103 catalysis (Fig. 1A). In particular, the amino acid sequence alignment clearly shows that  
104 YegK lacks the conserved glycine residue in motif VI and the aspartic acid residue in motif  
105 VIII (Fig. 1A).

106 A predicted structure of YegK using Phyre2 algorithm (Fig. S1) closely resembles the  
107 published structure of the bacterial PP2C-like phosphatase PphA from  
108 *Thermosynechococcus elongatus* (32) consisting of  $\beta$ -sheets and a catalytic core in the  
109 center surrounded by exterior alpha helices. In addition, *yegK* is located immediately  
110 upstream of *yegl*, an ORF which encodes a protein with homology to eukaryotic-like  
111 Ser/Thr kinases, consistent with the observation that bacterial Ser/Thr kinases and  
112 phosphatases are often located in operons (5). Taken together, these observations  
113 suggest that, despite the absence of two highly conserved residues, *yegK* likely encodes  
114 a PP2C-like phosphatase.

115

### 116 **Biochemical characterization of YegK**

117 To demonstrate that *yegK* encodes a functional protein phosphatase, the 762bp fragment  
118 was cloned in frame with a N-terminal six-histidine tag into the pBAD24 vector (33). The  
119 plasmid was transformed into *E. coli* C43 (DE3) and following protein expression, the cell  
120 lysate was subjected to affinity purification using Ni<sup>2+</sup>-NTA resin and subsequent analysis  
121 by SDS-PAGE. The protein migrated at an apparent molecular mass of ~25kDa, similar

122 to the calculated molecular mass of 28.18kDa (Fig S2). The phosphatase activity of  
123 purified YegK was determined using an absorbance-based assay which measures the  
124 hydrolysis of *p*-nitrophenyl phosphate to *p*-nitrophenol. Formation of *p*-nitrophenol  
125 detected at an absorbance of 405nm is directly proportional to the phosphatase activity  
126 which is expressed as nmol of pNP formed/ $\mu$ g protein. YegK displayed a time-dependent  
127 increase in phosphatase activity (Fig. 2A) consistent with the alignment (Fig. 1), that it is  
128 an active protein phosphatase. We have therefore renamed YegK as PphC (**P**rotein  
129 **p**hosphatase C) following the nomenclature of two previously characterized *E. coli* protein  
130 phosphatases PphA and PphB (34) and the bacterial PP2C-like phosphatase PphA from  
131 *T. elongatus* (32).

132 To further confirm the bioinformatic identification of PphC as a PP2C-like  
133 phosphatase, the aspartic acid residue (D46) in motif II was mutated to asparagine. A  
134 similar approach was used in the analysis of the PP2C-like phosphatase Cpp1 from  
135 *Chlamydia trachomatis* (22). The mutant protein (PphC-D46N) was purified as above and  
136 phosphatase activity was compared to wild type PphC. PphC-D46N displays no hydrolysis  
137 of pNPP suggesting that the aspartic acid residue is essential for catalytic activity (Fig.  
138 2B). To ensure that the loss of activity of PphC-D46N was not a consequence of improper  
139 folding, PphC and PphC-D46N were subjected to size exclusion chromatography. The gel  
140 filtration elution profile shows that PphC-D46N eluted as a single peak and at the same  
141 retention volume as PphC indicating that the loss of phosphatase activity observed with  
142 the PphC-D46N mutant is most likely due to a loss of catalytic activity (Fig. 2C).

143 PP2C phosphatases belong to the PPM family of metal dependent Ser/Thr  
144 phosphatases that require either  $Mg^{2+}$  or  $Mn^{2+}$  for activity (19, 29). The requirement for a  
145 divalent cation for PphC phosphatase activity was assessed by measuring hydrolysis of  
146 pNPP in the presence of either  $MgCl_2$ / $MnCl_2$ /  $CaCl_2$ /  $ZnCl_2$ ,  $NiCl_2$ . Since pNPP hydrolysis  
147 was only observed in the presence of  $MnCl_2$  but not  $MgCl_2$ ,  $CaCl_2$ ,  $ZnCl_2$ ,  $NiCl_2$ , PphC is

148  $Mn^{2+}$  dependent phosphatase (Fig. 3A; Fig. S3). This result is consistent with the  
149 requirement for  $Mn^{2+}$  ion for previously characterized bacterial PP2Cs (21-25, 27). The  
150 concentration dependence of PphC phosphatase activity on  $Mn^{2+}$  was measured and the  
151 optimal  $MnCl_2$  concentration was determined to be 5mM (Fig. 3B).

152 The effect of different classes of protein phosphatase inhibitors on PphC  
153 phosphatase activity was tested using pNPP as a substrate. PphC activity dramatically  
154 decreased in the presence of general protein phosphatase inhibitor sodium phosphate  
155 and was slightly affected by sodium fluoride (~30% decrease at 100mM). Okadaic acid, a  
156 known inhibitor of PP2A and PP2B family of phosphatases (35), did not inhibit PphC  
157 activity. PphC activity was also unaffected by sodium orthovanadate, a known tyrosine  
158 phosphatase inhibitor. Aurin tricarboxylic acid and 5,5' Methylene disalicylic acid which  
159 were previously reported to inhibit *Staphylococcus aureus* Stp1 (36, 37) had little effect on  
160 PphC phosphatase activity. Similarly, sanguinarine chloride an inhibitor of Human PP2C $\alpha$   
161 (38) did not affect phosphatase activity. However, a ~60% decrease in activity was  
162 detected in the presence of bivalent metal chelator EDTA confirming that PphC is a metal  
163 dependent phosphatase. Together, these data are consistent with the characterization of  
164 PphC as a PP2C-like phosphatase.

165

#### 166 **PphC phosphatase activity is different in closely related *E. coli* strains.**

167 We identified striking differences in the genetic architecture surrounding the *pphC* (*yegK*)  
168 locus in *E. coli* K and B strains. Specifically, in the *E. coli* B strain REL606, *pphC* (*yegK*)  
169 is immediately upstream of *yegI*, an ORF encoding a putative Ser/Thr kinase, whereas in  
170 the *E. coli* K strain MG1655, a putative ORF, *yegJ*, is located between the *pphC* (*yegK*)  
171 and *yegI* genes facing the opposite direction (Fig. 4A). This different genomic organization  
172 is conserved in other K and B strains, suggesting that it pre-dates the divergence of these  
173 lineages (39). A reasonable prediction is that *pphC* and/or *yegI* expression would be



174 affected by the presence of the divergently oriented *yegJ*, but as we have not been able  
175 to identify conditions under which we can robustly detect *pphC* expression, it has not been  
176 possible to evaluate this prediction.

177 In addition to this difference in the genetic architecture around the *pphC* locus,  
178 multiple sequence alignment of *pphC* from a K strain (MG1655) and a B strain (REL606)  
179 revealed that only ~92% of the PphC sequence is conserved (Fig. 4B). This is in contrast  
180 to the extremely high degree of sequence identity typically observed for the *E. coli*  
181 proteome: more than half the proteins in MG1655 have 100% sequence identity with the  
182 corresponding protein in REL606 (39). To determine whether these differences in amino  
183 acid sequence affect phosphatase activity, the gene product of *yegK* from *E. coli* MG1655  
184 was over-expressed and purified by the same method used to purify REL606 PphC. The  
185 enzyme kinetics of the two proteins was compared using the pNPP assay (Fig. 4C).  
186 Phosphatase activity (pmol of pNP/min/ $\mu$ g) was determined with increasing  
187 concentrations of pNPP and  $K_m$  and  $V_{max}$  values were calculated (Fig. 4D). Rel606 PphC  
188 is more active than MG1655 PphC (Fig. 4E) since its  $K_m$  and  $V_{max}$  are lower, indicating  
189 that it reaches a maximum velocity at a lower substrate concentration. Similarly, the  $K_{cat}$   
190 values were calculated to be  $0.2089\text{ s}^{-1}$  and  $0.093\text{ s}^{-1}$  for REL606 and MG1655 PphC,  
191 respectively. Previously reported kinetic values for known bacterial PP2Cs range from  
192  $0.35\text{ mM}$  to  $5.7\text{ mM}$  pNPP for  $K_m$  and  $0.1$  to  $7.4\text{ s}^{-1}$  for  $K_{cat}$  (22-24, 26, 27, 31, 40-43),  
193 indicating that PphC has relatively low phosphatase activity *in vitro* as compared to  
194 previously characterized bacterial PP2C-like phosphatases.

195

### 196 **Substrate specificity of PphC**

197 The results of the pNPP assay suggested that PphC has phosphatase activity. Therefore,  
198 we investigated whether PphC is capable of dephosphorylating a protein substrate.  $\beta$ -  
199 casein is phosphorylated on five serine residues at the N-terminus (44) and was used as

200 a model protein in our assay. Using  $Mn^{2+}$ -Phos-tag/SDS-PAGE to monitor phosphorylation  
201 state (45), untreated  $\beta$ -casein migrated at an apparent molecular mass of 30kDa (Fig. 5A,  
202 lane 1), but  $\beta$ -casein that had been pre-incubated with PphC exhibited a mobility shift (Fig.  
203 5A, lane 2 ). Since such a change is indicative of a loss in phosphorylation, PphC likely  
204 dephosphorylated the serine residues of  $\beta$ -casein. Further, this mobility shift was not  
205 detected following incubation of  $\beta$ -casein with catalytic mutant PphC-D46N (Fig. 5A, lane  
206 4 ). These results indicate that PphC is capable of acting as a serine phosphatase.

207 The substrate specificity of PphC was further examined using commercially available  
208 phosphopeptides. Previously characterized PP2Cs have demonstrated preferential  
209 specificity to phosphoserine/threonine peptides over phosphotyrosine peptides (22, 23,  
210 30, 40). Phosphatase assays were performed with phosphoserine RRA(pS)VA,  
211 phosphothreonine KR(pT)IRR and phosphotyrosine RRLIEDAE(pY)AARG peptide  
212 substrates (Fig. S4). PphC released two-fold more phosphate in the presence of the  
213 phosphotyrosine peptide as compared to the phosphothreonine peptide and it had no  
214 effect on the phosphoserine peptide. To confirm that the phosphopeptides are capable of  
215 being dephosphorylated, we used a known PP2C-like phosphatase (*B. subtilis* PrpC) as  
216 a positive control. As expected, PrpC dephosphorylated both serine and threonine  
217 residues and had minimal activity to tyrosine. Thus, in comparison to PrpC, PphC had  
218 overall minimal activity on phosphopeptides suggesting that they may not be an ideal  
219 substrate for PphC.

220

## 221 **Identification of a PphC substrate**

222 Bacterial PP2C-like phosphatases are often present in the same operon as a Ser/Thr  
223 kinase (5) and the kinase is often itself a substrate of the phosphatase (25-27, 46). As  
224 noted above, *pphC(yegK)* is located immediately adjacent to *yegl*, a 1947bp ORF

225 encoding a 648 amino acid protein with homology to eukaryotic-like Ser/Thr kinases (Fig.  
226 4A). (5). Thus, to examine if Yegl could serve as substrate for PphC, autophosphorylated  
227 Yegl kinase (Fig. 5B, lane 1) was incubated in the presence of wild type or D46N mutant  
228 PphC and assayed for loss of phosphorylation. While wild type PphC dephosphorylates  
229 Yegl kinase, as indicated by the loss of the radiolabeled band (Fig. 5B, lane 2; 5C), this  
230 effect is not seen following incubation with the catalytic mutant PphC-D46N (Fig. 5B, lane  
231 3; 5C).

232 In these assays, a phosphorylation product of ~25kDa corresponding to PphC-D46N  
233 was observed (Fig. 5B, lane 3), suggesting that Yegl could also phosphorylate PphC.  
234 However, we have been unable to demonstrate any effect of this modification on PphC  
235 activity using either the pNPP or the  $\beta$ -casein dephosphorylation assays (data not shown).  
236 Interestingly, while PphC-D46N is phosphorylated, phosphorylation of wild type PphC is  
237 not observed (Fig. 5B, lane 2), suggesting that PphC can dephosphorylate itself.

238

## 239 **Discussion**

240 Mass spectrometry-based phosphoproteomic analysis has revealed that many  
241 Ser/Thr/Tyr residues undergo phosphorylation in phylogenetically diverse species. In most  
242 cases, the kinases and phosphatases responsible for these modifications have not been  
243 identified, although the presence of homologs of eukaryotic Ser/Thr kinases and  
244 phosphatases in most (if not all) bacterial species suggest that they could play a role.  
245 These so-called eukaryotic-like Ser/Thr kinases and their partner PP2C-like Ser/Thr  
246 phosphatases have extensive structural and biochemical similarity with their eukaryotic  
247 counterparts (5). In *E. coli*, extensive Ser/Thr phosphorylation has been observed, with  
248 several studies reporting >75 proteins (6-9). However, the kinases and phosphatases  
249 responsible for making or removing these modifications are not known. Here, we describe

250 biochemical analysis of PphC, a protein product of a previously undescribed *E. coli* ORF,  
251 *yegK*, that encodes the first reported PP2C-like Ser/Thr phosphatase in *E. coli*.

252 PphC contains all of the 11 conserved motifs present in PPM/PP2C phosphatases (16,  
253 17, 19, 29). However, unlike bacterial PP2C-like phosphatases from other Gram-negative  
254 bacteria, PphC has only 6 out of the 8 absolutely conserved residues involved in metal  
255 co-ordination and catalysis (32, 43, 47). Specifically, PphC lacks a conserved glycine  
256 residue in motif VI and a conserved aspartate residue in motif VIII (Fig. 1A). The aspartate  
257 residue in motif VIII is important for metal ion co-ordination in bacterial PP2C-like  
258 phosphatases (32, 43, 47). Despite these differences in amino acid sequence, PphC was  
259 able to effectively hydrolyze the chromogenic substrate pNPP, suggesting that the  
260 requirement of all 8 residues as a criterion for assessing the likelihood that an ORF  
261 encodes a PP2C-like phosphatase may be too stringent.

262 The regulation of PP2C-like phosphatases has been studied in a number of  
263 contexts including the *Mycobacterium tuberculosis* PstP PP2C-like phosphatase whose  
264 activity is stimulated by phosphorylation on multiple Thr residues by two eukaryotic-like  
265 Ser/Thr kinases (48). Although we observed that PphC is phosphorylated by its partner  
266 Ser/Thr kinase YegI (Fig. 5B), we were unable to detect any effect on PphC activity.  
267 Another regulatory mechanism occurs in the *B. subtilis* SpoIIE protein, a PP2C-like  
268 phosphatase that plays an essential role during sporulation. A single residue in SpoIIE  
269 (Val-697) mediates an alpha-helical switch that changes the coordination of a metal ion in  
270 the active site and thereby activates the phosphatase (49). However, since this residue  
271 is not conserved in PphC, this regulatory mechanism is probably not operating in the  
272 context of PphC function.

273 Bacterial PP2C-like phosphatases are known to dephosphorylate pSer/pThr  
274 containing peptides (22-24). PphC was initially identified using a homology search using  
275 *B. subtilis* PrpC but unlike PrpC, PphC failed to dephosphorylate phosphopeptides and  
276 displayed no preference for pSer/pThr/pTyr peptides (Supp. Fig. 4). This lack of activity  
277 against phosphopeptides is in contrast to the ability of PphC to dephosphorylate the pSer  
278 containing protein substrate  $\beta$ -casein. A possible explanation could be that PphC may  
279 require additional residues for substrate recognition and/or binding that are not present in  
280 the phosphopeptides. However, this is not likely to be a sufficient explanation as  $\beta$ -casein  
281 is a generic substrate that would not be expected to contain specificity determinants for  
282 PphC. Alternatively, this result suggests that there may be limits to using phosphopeptide  
283 dephosphorylation as an accurate assay of PP2C-like phosphatase function.

284 Bacterial eukaryotic-like Ser/Thr kinases and PP2C-like phosphatases are often  
285 encoded in the same operon and in many cases the kinase is a substrate for the  
286 phosphatase (21, 25-27). Similarly, in the *E. coli* B strain REL606, the ORF *yegI* encodes  
287 a putative eukaryotic-like Ser/Thr kinase and is located immediately downstream of *pphC*.  
288 Our data demonstrate that Yegl is a substrate of PphC (Fig. 5C). However, in *E. coli* K  
289 strain MG1655, there is a putative intervening ORF, *yegJ*, located between the *yegI* and  
290 *pphC* genes and that is transcribed divergently (Fig.4A), suggesting potential regulatory  
291 differences between the two strains. We have been unable to observe transcription of the  
292 *pphC* locus under any conditions, so we do not know if *yegJ* has an effect on expression  
293 of this locus. Interestingly, mutations in *yegI*, the gene encoding the partner kinase of  
294 PphC, repeatedly emerge in long-term evolution experiments (50), suggesting that this  
295 kinase/phosphatase pair may have significant fitness effects. Consistently, the presence  
296 of the potentially disruptive *yegJ* locus in the K lineage may be also reflect these effects.

297 However, at present, in the absence of a deeper understanding of the physiological role  
298 of Yegl/PphC pair, these effects remain mysterious.

299 In addition to the differences in the genome organization around *pphC* in the *E. coli* B  
300 and K lineages, the amino acid sequence of PphC differs between the two strains, with  
301 several non-conservative substitutions. This observation is intriguing given that half of the  
302 proteome is identical between these two strains (39). Although these differences are not  
303 in residues that are absolutely conserved among bacterial PP2C-like phosphatases (32,  
304 43, 47), they may have functional consequences since the two proteins exhibited modest  
305 differences in enzyme kinetics (Fig 4C-E). Future work will be aimed at identifying the  
306 impact of specific substitutions in the residues that differ on the relative activity of the  
307 different PphC alleles.

308 Finally, PP2C phosphatases play important roles in cellular regulation in more  
309 complex systems including mammals (19). One issue in investigating PP2C function in  
310 these *in vivo* contexts is that specific chemical inhibitors do not exist. Thus, the bacterial  
311 homologs such as PphC may be useful in identifying cell-permeable inhibitors, both  
312 because of the technical tractability of the organism as well as the presence of only a  
313 single PP2C-phosphatase gene in the genome.

314 In summary, our study provides the first evidence for the existence of a PP2C-like  
315 phosphatase in *E. coli*. Despite some differences in sequence conservation as compared  
316 to other PP2Cs, PphC is an active PP2C-like phosphatase, albeit with lower  $K_m$  and  $V_{max}$   
317 values than other bacterial PP2Cs. Future studies will be required to identify physiological  
318 substrates of PphC and to ascertain its physiological role *in vivo*. We expect that further  
319 characterization of PphC's partner kinase, Yegl, will greatly facilitate these efforts.

320

321

## 322 **Experimental Procedures**

### 323 **Bacterial strains and growth conditions**

324 *E. coli* DH5 $\alpha$  cells were used for regular cloning and C43(DE3) and LOBSTR (BL21-DE3)  
325 strains were used for expression of recombinant proteins. *E. coli* cells were grown in LB  
326 Lennox broth supplemented with ampicillin (100 $\mu$ g/ml) at 37 °C with shaking (220 rpm)  
327 unless otherwise specified. Details of strains, plasmids and primers used in the study are  
328 described in Supplementary Tables S1, S2, and S3, respectively.

329

### 330 **Cloning and expression of YegK(PphC)**

331 Genomic DNA from *E. coli* REL606 and MG1655 was isolated using a Wizard Genomic  
332 DNA purification kit (Promega) following manufacturer's instructions. The *E. coli yegK*  
333 (*pphC*) gene was PCR amplified using Phusion polymerase (Thermo Scientific) from  
334 REL606 genomic DNA using primers (KR38/KR39). Sequence for an N-terminal His<sub>6</sub> tag  
335 was included in the primer. The PCR product was digested with NcoI/PstI and ligated into  
336 similarly digested pBAD24 plasmid backbone. Ligation products were transformed into  
337 DH5 $\alpha$  cells and selected on LB ampicillin plates. The resulting plasmid generated an N-  
338 terminal His<sub>6</sub>-tagged YegK (PphC) fusion protein.

339 For protein expression, all plasmids were transformed in C43DE3 cells and plated on  
340 LB ampicillin (100 $\mu$ g/ml) agar plates. Single colonies were inoculated into 3ml LB  
341 supplemented with ampicillin (100 $\mu$ g/ml) for overnight cultures. The next day, 400ml  
342 cultures were diluted 1:250 and grown to an OD<sub>600</sub> of 0.6-0.8. Recombinant protein was  
343 induced by addition of arabinose (0.2% w/v) for 3h at 25 °C. Cells were harvested at  
344 6000xg for 15 min at 4 °C. Pellets were washed with ice-cold 50mM EDTA and centrifuged  
345 at 7000 rpm for 15 min at 4 °C. Washed pellets were saved at -80 °C until use.

346

347 **Oligonucleotide site directed mutagenesis**

348 Point mutation of aspartic acid residue D46 was generated by two step overlap PCR  
349 mutagenesis using primer pairs (KR38/KR41) and (KR40/KR39) with Phusion  
350 polymerase. A second PCR was performed with primers (KR38/KR39) using primary PCR  
351 products as a template and the subsequent PCR products were digested as above and  
352 ligated into pBAD24 to generate an N-terminal His<sub>6</sub> tagged D46N YegK(PphC) fusion  
353 protein. Plasmid cloning was subsequently verified by restriction enzyme digest and DNA  
354 sequencing (Operon).

355

356 **Purification of recombinant PphC**

357 Frozen pellets were suspended in lysis buffer (20mM Tris pH 8.0, 250mM NaCl, 30mM  
358 imidazole, 10mM β-mercaptoethanol, 0.2% Triton-X 100, 10mg/ml lysozyme, 1mM PMSF)  
359 and incubated on ice for 30 min. Initial lysis was carried out by four cycles of freeze/ thaw  
360 in dry ice/ethanol bath and 37 °C. Lysate was passed through a 22-gauge needle and  
361 added to pre-chilled 2mL screw cap tubes with 0.1mm silica beads. Cells were lysed using  
362 a FastPrep-24 5G instrument (MP Biomedical) using 2 rounds of 6.5m/s intensity for 40  
363 secs with 4 min incubation on ice between rounds. Lysates were cleared by centrifugation  
364 at 20,000xg for 30 mins at 4 °C. Cleared lysates were incubated in Pierce 5ml columns  
365 with Ni-NTA Agarose beads (Qiagen) at 4 °C for 1hr. Lysate was allowed to flow through  
366 and beads were washed 10 column volumes of wash buffer (20mM Tris pH 8.0, 250mM  
367 NaCl, 30mM imidazole, 10mM β-mercaptoethanol). His<sub>6</sub>-tagged protein was eluted using  
368 increasing concentrations of imidazole (100-500mM) in 20mM Tris pH 8.0, 250mM NaCl.  
369 Elution fractions were analysed on a 10% SDS-PAGE gel and fractions containing protein  
370 were pooled and dialyzed overnight at 4 °C using Slide-A-Lyzer mini dialysis device 10K  
371 MWCO (Thermo Scientific) in phosphatase storage buffer (20mM Tris pH 8.0, 50mM



372 NaCl, 1mM DTT, 1mM MnCl<sub>2</sub>). Dialyzed samples were concentrated in Amicon Ultra 10K  
373 centrifugal filters to 1ml and then loaded onto a HiLoad 16/60 superdex 75 prep grade (GE  
374 Biosciences) gel filtration column. The column was preequilibrated and run with  
375 phosphatase storage buffer. PphC elutes at a retention volume of ~70ml. Fractions  
376 containing PphC were pooled, concentrated and assessed for purity using a 12% SDS  
377 PAGE gel. The catalytic variant was purified using the same protocol. Proteins were stored  
378 at -80 °C.

379

### 380 **Cloning and expression of Yegl**

381 The *yegl* gene was PCR amplified using Phusion polymerase (Thermo Scientific) from *E.*  
382 *coli* REL606 genomic DNA using primers (KR58/KR59). Sequence for N-terminal His<sub>6</sub> tag  
383 was included in the primer. The PCR product was digested with NcoI/SphI and ligated into  
384 similarly digested pBAD24 plasmid backbone. Ligation products were transformed in  
385 DH5 $\alpha$  cells and selected on LB/ampicillin plates. The resulting plasmid generated an N-  
386 terminal His<sub>6</sub>-tagged Yegl fusion protein. Plasmid cloning was subsequently verified by  
387 restriction enzyme digest and DNA sequencing (Operon). For protein expression, plasmid  
388 was transformed in *E. coli* LOBSTR (Kerafast) cells and plated on LB ampicillin (100 $\mu$ g/ml)  
389 agar plates. Single colonies were inoculated into 3ml LB supplemented with ampicillin  
390 (100 $\mu$ g/ml) for overnight cultures. The next day, a dilution of 1:250 in 500ml LB was grown  
391 to an OD<sub>600</sub> of 0.6-0.8. Recombinant protein was induced by addition of arabinose (0.2%  
392 w/v) for 3h at 18 °C. Cells were harvested at 6000xg for 15 min at 4 °C. Pellets were  
393 washed with ice-cold 50mM EDTA and centrifuged at 7000 rpm for 15 min at 4 °C. Washed  
394 pellets were saved at -80 °C until use.

395

### 396 **Purification of recombinant Yegl**

397 Frozen pellets were suspended in lysis buffer (50mM Tris pH 8.0, 200mM NaCl, 10mM  $\beta$ -  
398 mercaptoethanol, 1mM PMSF and 2% w/v sarkosyl) and incubated at room temperature  
399 for overnight lysis. Cells were subsequently lysed using sonication. Lysates were cleared  
400 by centrifugation at 15000xg for 30 min at 4 °C. Cleared lysates were incubated in Pierce  
401 5ml columns with Ni<sup>2+</sup>-NTA Agarose beads (Qiagen) at 4 °C for 1h. Lysate was allowed to  
402 flow through and beads were washed 10 column volumes of wash buffer (50mM Tris pH  
403 8.0, 200mM NaCl, 30mM imidazole, 10mM  $\beta$ -mercaptoethanol, 0.05% w/v sarkosyl). His  
404 tagged protein was eluted using 300mM imidazole in 50mM Tris pH 8.0, 200mM NaCl,  
405 10mM  $\beta$ -mercaptoethanol and 0.05% w/v sarkosyl. Elution Fractions were tested on 12%  
406 SDS PAGE gel and fractions containing protein were pooled and dialyzed overnight at 4  
407 °C using Snakeskin dialysis tubing 10K MWCO (Thermo Scientific) in kinase storage  
408 buffer (20mM Tris pH 8.0, 125mM NaCl, 10% glycerol, 1mM DTT). Dialyzed protein was  
409 assessed for purity using 12% SDS PAGE gel and stored at -80 °C.

410

#### 411 **Phosphatase assays**

412 The phosphatase activity of PphC (YegK) was determined by hydrolysis of *p*-nitrophenol  
413 phosphate (pNPP) to *p*-nitrophenol using spectrophotometry. Assays were performed in  
414 triplicate in a 96 well plate. Each well contained 350nM purified PphC (WT or mutant) in  
415 assay buffer (10mM Tris pH 8.0, 5mM MnCl<sub>2</sub>). Reactions were initiated by addition of 5mM  
416 pNPP (NEB) and absorbance measurements were recorded every 10 min at 405nm for  
417 120 min in a Tecan Infinite 200 plate reader. Amount of phosphate released is represented  
418 as nmol pNP/ $\mu$ g of protein and the amount of pNP was calculated using extinction  
419 coefficient of 18000 M<sup>-1</sup>cm<sup>-1</sup>.

420 Metal dependence was determined by incubating 350nM purified PphC in assay buffer  
421 containing either 5mM MgCl<sub>2</sub>, 5mM MnCl<sub>2</sub>, 5mM CaCl<sub>2</sub>, 5mM ZnCl<sub>2</sub>, 5mM NiCl<sub>2</sub> or no  
422 metal. Absorbance measurements were recorded as above. To determine optimal MnCl<sub>2</sub>

423 concentrations, reactions were carried out with 350nM purified WT PphC in assay buffer  
424 with different  $MnCl_2$  concentrations (0-10mM) and absorbance was measured at 405nm.

425 Sensitivity to phosphatase inhibitors was determined by measuring phosphatase  
426 activity of purified PphC in the presence of the following: sodium phosphate (Sigma),  
427 sodium fluoride (Sigma), okadaic acid (Cell Signaling), sodium orthovanadate (NEB) or  
428 EDTA (Macron Chemicals), sanguinarine chloride (Tocris), aurin tricarboxylic acid (Alfa  
429 aesar) and 5,5' methylene disalicylic acid (Acros organics). Okadaic acid, sanguinarine  
430 chloride, aurin tricarboxylic acid and 5,5' methylene disalicylic acid were diluted in DMSO  
431 to get a 1mM stock. The remaining inhibitors were diluted to stock concentrations in sterile  
432 water pH 8. 150nM of purified WT PphC was incubated in assay buffer containing  
433 indicated concentrations of inhibitor or DMSO/water for 5 min. Reactions were initiated by  
434 addition of 5mM pNPP and absorbance was recorded every 5 min for 15 min at 30 °C in  
435 a Tecan Infinite 200 plate reader.

436 The kinetic parameters of PphC were determined by varying the pNPP concentration  
437 (0.1-6.4mM) in a reaction with 350nM of purified wild type PphC from either REL606 and  
438 MG1655 in assay buffer. Hydrolysis was monitored every 5 min for 30 min in the linear  
439 range of the reaction. Initial reaction velocities for every substrate concentration. To  
440 determine  $K_m$  and  $V_{max}$  values, the data was fit to a Michaelis-Menten curve and  
441 Lineweaver-Burke plot was derived using Graphpad Prism 7 software.

442

443 **Synthetic phosphopeptides.** To assess substrate specificity, 200 $\mu$ M of serine  
444 [RRApSVA], threonine [KRpTIRR] or tyrosine [RRLIEDAEpYAARG] phosphopeptides  
445 (Millipore) were incubated with 350nM phosphatase in a 50 $\mu$ l reaction containing 20mM  
446 Tris pH 8.0, 5mM  $MnCl_2$  for 30 min at 37 °C. Phosphatase reaction was stopped by  
447 addition of Biomol Green reagent (Enzo). Reaction was incubated at room temperature

448 for 25 min to allow color development and absorbance at OD<sub>620</sub> was measured. Phosphate  
449 standard (Enzo) was used to calculate amount of phosphate released.

450

451 **β-casein.** Phosphorylated β-casein (Sigma) was dissolved in 50mM Tris pH 7.5, 150mM  
452 NaCl to a final concentration of 4mg/ml. For the phosphatase assay, 4μg of β-casein was  
453 incubated with 1.5μg WT or D46N PphC in 20μl of 50mM Tris pH 8.0, 10mM MnCl<sub>2</sub> at 37  
454 °C for 1 h. Reactions were stopped with 3X SDS loading dye and samples were heat  
455 denatured at 95 °C for 5 min. Samples were loaded on 10% SDS polyacrylamide gel  
456 containing 50μM Phos-tag acrylamide as per manufacturer's instructions (Wako). Gels  
457 were run at constant voltage of 150V for 75 min at 4 °C. Proteins were visualized by  
458 Coomassie staining.

459

460 **Dephosphorylation of autophosphorylated Yegl.** Autophosphorylation of Yegl kinase  
461 was performed by addition of 5μCi of [ $\gamma$ -<sup>32</sup>P] ATP (Perkin Elmer) to 2μM of purified Yegl in  
462 12μl of reaction buffer containing 50mM Tris pH 7.5, 50mM KCl, 0.5mM DTT, 10mM  
463 MgCl<sub>2</sub>, 10mM MnCl<sub>2</sub>, 200μM ATP. Reactions were incubated at 37 °C and PphC or PphC-  
464 D46N was added to a final concentration of 4μM. Reactions were stopped at 45 min using  
465 3X Laemmli buffer and boiled for 5 min. Samples were resolved on a 12% SDS-PAGE gel  
466 and visualized by staining with Coomassie dye. Radioactive dried gel was exposed and  
467 visualized by autoradiography.

468

## 469 **Acknowledgements**

470 We would like to thank present and former members of our lab for helpful discussions. We  
471 acknowledge Elizabeth Nagle for performing some of the initial characterization of PphC.

472 This work was supported by an HHMI International Student Fellowship to KR and by NIH  
473 grant GM114213 to JD.

474

#### 475 **Conflict of interest**

476 The authors declare no conflict of interest.

477

#### 478 **Author contributions**

479 KR performed all of the experiments and KR and JD wrote the manuscript.

480

#### 481 **References:**

482

- 483 1. Hunter T. 1995. Protein kinases and phosphatases: the yin and yang of protein  
484 phosphorylation and signaling. *Cell* 80:225-36.
- 485 2. Stock JB, Ninfa AJ, Stock AM. 1989. Protein phosphorylation and regulation of  
486 adaptive responses in bacteria. *Microbiol Rev* 53:450-90.
- 487 3. Dworkin J. 2015. Ser/Thr phosphorylation as a regulatory mechanism in bacteria.  
488 *Curr Opin Microbiol* 24C:47-52.
- 489 4. Mijakovic I, Macek B. 2012. Impact of phosphoproteomics on studies of bacterial  
490 physiology. *FEMS Microbiol Rev* 36:877-92.
- 491 5. Pereira SF, Goss L, Dworkin J. 2011. Eukaryote-like serine/threonine kinases and  
492 phosphatases in bacteria. *Microbiology and molecular biology reviews* : *MMBR*  
493 75:192-212.
- 494 6. Lim S, Marcellin E, Jacob S, Nielsen LK. 2015. Global dynamics of *Escherichia*  
495 *coli* phosphoproteome in central carbon metabolism under changing culture  
496 conditions. *J Proteomics* 126:24-33.

- 497 7. Macek B, Gnad F, Soufi B, Kumar C, Olsen JV, Mijakovic I, Mann M. 2008.  
498 Phosphoproteome analysis of *E. coli* reveals evolutionary conservation of bacterial  
499 Ser/Thr/Tyr phosphorylation. *Mol Cell Proteomics* 7:299-307.
- 500 8. Qu Y, Wu S, Zhao R, Zink E, Orton DJ, Moore RJ, Meng D, Clauss TR, Aldrich JT,  
501 Lipton MS, Pasa-Tolic L. 2013. Automated immobilized metal affinity  
502 chromatography system for enrichment of *Escherichia coli* phosphoproteome.  
503 *Electrophoresis* 34:1619-26.
- 504 9. Soares NC, Spat P, Krug K, Macek B. 2013. Global dynamics of the *Escherichia*  
505 *coli* proteome and phosphoproteome during growth in minimal medium. *J*  
506 *Proteome Res* 12:2611-21.
- 507 10. Figueira R, Brown DR, Ferreira D, Eldridge MJ, Burchell L, Pan Z, Helaine S,  
508 Wigneshweraraj S. 2015. Adaptation to sustained nitrogen starvation by  
509 *Escherichia coli* requires the eukaryote-like serine/threonine kinase YeaG. *Sci Rep*  
510 5:17524.
- 511 11. Zheng J, He C, Singh VK, Martin NL, Jia Z. 2007. Crystal structure of a novel  
512 prokaryotic Ser/Thr kinase and its implication in the Cpx stress response pathway.  
513 *Mol Microbiol* 63:1360-71.
- 514 12. Dorsey-Oresto A, Lu T, Mosel M, Wang X, Salz T, Drlica K, Zhao X. 2013. YihE  
515 kinase is a central regulator of programmed cell death in bacteria. *Cell Rep* 3:528-  
516 37.
- 517 13. Kaspy I, Rotem E, Weiss N, Ronin I, Balaban NQ, Glaser G. 2013. HipA-mediated  
518 antibiotic persistence via phosphorylation of the glutamyl-tRNA-synthetase. *Nat*  
519 *Commun* 4:3001.
- 520 14. Germain E, Castro-Roa D, Zenkin N, Gerdes K. 2013. Molecular mechanism of  
521 bacterial persistence by HipA. *Mol Cell* 52:248-54.

- 522 15. Kennelly PJ. 2002. Protein kinases and protein phosphatases in prokaryotes: a  
523 genomic perspective. *FEMS Microbiol Lett* 206:1-8.
- 524 16. Shi L. 2004. Manganese-dependent protein O-phosphatases in prokaryotes and  
525 their biological functions. *Front Biosci* 9:1382-97.
- 526 17. Shi L, Potts M, Kennelly PJ. 1998. The serine, threonine, and/or tyrosine-specific  
527 protein kinases and protein phosphatases of prokaryotic organisms: a family  
528 portrait. *FEMS Microbiol Rev* 22:229-53.
- 529 18. Zhang CC. 1996. Bacterial signalling involving eukaryotic-type protein kinases.  
530 *Mol Microbiol* 20:9-15.
- 531 19. Shi Y. 2009. Serine/threonine phosphatases: mechanism through structure. *Cell*  
532 139:468-84.
- 533 20. Das AK, Helps NR, Cohen PT, Barford D. 1996. Crystal structure of the protein  
534 serine/threonine phosphatase 2C at 2.0 Å resolution. *EMBO J* 15:6798-809.
- 535 21. Arora G, Sajid A, Arulanandh MD, Misra R, Singhal A, Kumar S, Singh LK, Mattoo  
536 AR, Raj R, Maiti S, Basu-Modak S, Singh Y. 2013. Zinc regulates the activity of  
537 kinase-phosphatase pair (BasPrkC/BasPrpC) in *Bacillus anthracis*. *Biometals*  
538 26:715-30.
- 539 22. Claywell JE, Fisher DJ. 2016. CTL0511 from *Chlamydia trachomatis* Is a Type 2C  
540 Protein Phosphatase with Broad Substrate Specificity. *J Bacteriol* 198:1827-36.
- 541 23. Lai SM, Le Moual H. 2005. PrpZ, a *Salmonella enterica* serovar *Typhi*  
542 serine/threonine protein phosphatase 2C with dual substrate specificity.  
543 *Microbiology* 151:1159-67.
- 544 24. Menegatti AC, Vernal J, Terenzi H. 2015. The unique serine/threonine  
545 phosphatase from the minimal bacterium *Mycoplasma synoviae*: biochemical  
546 characterization and metal dependence. *J Biol Inorg Chem* 20:61-75.

- 547 25. Mukhopadhyay S, Kapatral V, Xu W, Chakrabarty AM. 1999. Characterization of a  
548 Hank's type serine/threonine kinase and serine/threonine phosphoprotein  
549 phosphatase in *Pseudomonas aeruginosa*. Journal of bacteriology 181:6615-22.
- 550 26. Obuchowski M, Madec E, Delattre D, Boel G, Iwanicki A, Foulger D, Seror SJ.  
551 2000. Characterization of PrpC from *Bacillus subtilis*, a member of the PPM  
552 phosphatase family. J Bacteriol 182:5634-8.
- 553 27. Rajagopal L, Clancy A, Rubens CE. 2003. A eukaryotic type serine/threonine  
554 kinase and phosphatase in *Streptococcus agalactiae* reversibly phosphorylate an  
555 inorganic pyrophosphatase and affect growth, cell segregation, and virulence. J  
556 Biol Chem 278:14429-41.
- 557 28. Treuner-Lange A, Ward MJ, Zusman DR. 2001. Pph1 from *Myxococcus xanthus*  
558 is a protein phosphatase involved in vegetative growth and development. Mol  
559 Microbiol 40:126-40.
- 560 29. Bork P, Brown NP, Hegyi H, Schultz J. 1996. The protein phosphatase 2C (PP2C)  
561 superfamily: detection of bacterial homologues. Protein science : a publication of  
562 the Protein Society 5:1421-5.
- 563 30. Su J, Forchhammer K. 2013. Determinants for substrate specificity of the bacterial  
564 PP2C protein phosphatase tPphA from *Thermosynechococcus elongatus*. FEBS  
565 J 280:694-707.
- 566 31. Su J, Schlicker C, Forchhammer K. 2011. A third metal is required for catalytic  
567 activity of the signal-transducing protein phosphatase M tPphA. J Biol Chem  
568 286:13481-8.
- 569 32. Schlicker C, Fokina O, Kloft N, Grune T, Becker S, Sheldrick GM, Forchhammer  
570 K. 2008. Structural analysis of the PP2C phosphatase tPphA from  
571 *Thermosynechococcus elongatus*: a flexible flap subdomain controls access to the  
572 catalytic site. J Mol Biol 376:570-81.



- 573 33. Guzman LM, Belin D, Carson MJ, Beckwith J. 1995. Tight regulation, modulation,  
574 and high-level expression by vectors containing the arabinose PBAD promoter. J  
575 Bacteriol 177:4121-30.
- 576 34. Missiakas D, Raina S. 1997. Signal transduction pathways in response to protein  
577 misfolding in the extracytoplasmic compartments of *E. coli*: role of two new  
578 phosphoprotein phosphatases PrpA and PrpB. EMBO J 16:1670-85.
- 579 35. MacKintosh C, MacKintosh RW. 1994. Inhibitors of protein kinases and  
580 phosphatases. Trends Biochem Sci 19:444-8.
- 581 36. Zheng W, Cai X, Xie M, Liang Y, Wang T, Li Z. 2016. Structure-Based Identification  
582 of a Potent Inhibitor Targeting Stp1-Mediated Virulence Regulation in  
583 *Staphylococcus aureus*. Cell Chem Biol 23:1002-13.
- 584 37. Zheng W, Liang Y, Zhao H, Zhang J, Li Z. 2015. 5,5'-Methylenedisalicylic Acid  
585 (MDSA) Modulates SarA/MgrA Phosphorylation by Targeting Ser/Thr  
586 Phosphatase Stp1. Chembiochem 16:1035-40.
- 587 38. Aburai N, Yoshida M, Ohnishi M, Kimura K. 2010. Sanguinarine as a potent and  
588 specific inhibitor of protein phosphatase 2C in vitro and induces apoptosis via  
589 phosphorylation of p38 in HL60 cells. Biosci Biotechnol Biochem 74:548-52.
- 590 39. Studier FW, Daegelen P, Lenski RE, Maslov S, Kim JF. 2009. Understanding the  
591 differences between genome sequences of *Escherichia coli* B strains REL606 and  
592 BL21(DE3) and comparison of the *E. coli* B and K-12 genomes. J Mol Biol 394:653-  
593 80.
- 594 40. Kimura Y, Mori Y, Ina Y, Takegawa K. 2011. Enzymatic and functional analysis of  
595 a protein phosphatase, Pph3, from *Myxococcus xanthus*. J Bacteriol 193:2657-61.
- 596 41. Halbedel S, Busse J, Schmidl SR, Stulke J. 2006. Regulatory protein  
597 phosphorylation in *Mycoplasma pneumoniae*. A PP2C-type phosphatase serves  
598 to dephosphorylate HPr(Ser-P). J Biol Chem 281:26253-9.

- 599 42. Jin H, Pancholi V. 2006. Identification and biochemical characterization of a  
600 eukaryotic-type serine/threonine kinase and its cognate phosphatase in  
601 *Streptococcus pyogenes*: their biological functions and substrate identification. J  
602 Mol Biol 357:1351-72.
- 603 43. Pullen KE, Ng HL, Sung PY, Good MC, Smith SM, Alber T. 2004. An alternate  
604 conformation and a third metal in PstP/Ppp, the *M. tuberculosis* PP2C-Family  
605 Ser/Thr protein phosphatase. Structure 12:1947-54.
- 606 44. Bingham EW. 1976. Modification of casein by phosphatases and protein kinases.  
607 J Agric Food Chem 24:1094-9.
- 608 45. Kinoshita E, Kinoshita-Kikuta E, Takiyama K, Koike T. 2006. Phosphate-binding  
609 tag, a new tool to visualize phosphorylated proteins. Mol Cell Proteomics 5:749-  
610 57.
- 611 46. Chopra P, Singh B, Singh R, Vohra R, Koul A, Meena LS, Koduri H, Ghildiyal M,  
612 Deol P, Das TK, Tyagi AK, Singh Y. 2003. Phosphoprotein phosphatase of  
613 *Mycobacterium tuberculosis* dephosphorylates serine-threonine kinases PknA and  
614 PknB. Biochem Biophys Res Commun 311:112-20.
- 615 47. Rantanen MK, Lehtio L, Rajagopal L, Rubens CE, Goldman A. 2007. Structure of  
616 *Streptococcus agalactiae* serine/threonine phosphatase. The subdomain  
617 conformation is coupled to the binding of a third metal ion. FEBS J 274:3128-37.
- 618 48. Sajid A, Arora G, Gupta M, Upadhyay S, Nandicoori VK, Singh Y. 2011.  
619 Phosphorylation of Mycobacterium tuberculosis Ser/Thr phosphatase by PknA and  
620 PknB. PLoS One 6:e17871.
- 621 49. Bradshaw N, Levnikov VM, Zimanyi CM, Gaudet R, Wilkinson AJ, Losick R. 2017.  
622 A widespread family of serine/threonine protein phosphatases shares a common  
623 regulatory switch with proteasomal proteases. Elife 6.

- 624 50. Barrick JE, Yu DS, Yoon SH, Jeong H, Oh TK, Schneider D, Lenski RE, Kim JF.  
625 2009. Genome evolution and adaptation in a long-term experiment with  
626 *Escherichia coli*. Nature 461:1243-7.
- 627 51. Notredame C, Higgins DG, Heringa J. 2000. T-Coffee: A novel method for fast and  
628 accurate multiple sequence alignment. J Mol Biol 302:205-17.
- 629

630 **Table 1. Inhibitor effects on PphC activity.**

631

| No. | Inhibitors (Concentration)                    | % Relative activity |
|-----|-----------------------------------------------|---------------------|
| 1.  | No inhibitor                                  | 100                 |
| 2.  | Sodium phosphate (5mM)                        | 13                  |
|     | Sodium phosphate (10mM)                       | 6                   |
| 3   | Sodium fluoride (10mM)                        | 81                  |
|     | Sodium fluoride (100mM)                       | 70                  |
| 4   | Sodium orthovanadate (5 $\mu$ M)              | 87                  |
|     | Sodium orthovanadate (50 $\mu$ M)             | 95                  |
| 5   | Okadaic acid (0.1 $\mu$ M)                    | 91                  |
|     | Okadaic acid (1 $\mu$ M)                      | 88                  |
| 6   | EDTA (1mM)                                    | 63                  |
|     | EDTA (2mM)                                    | 38                  |
| 7   | Aurin tricarboxylic acid (25 $\mu$ M)         | 82                  |
|     | Aurin tricarboxylic acid (50 $\mu$ M)         | 66                  |
|     | Aurin tricarboxylic acid (100 $\mu$ M)        | 52                  |
| 8   | 5,5' Methylene disalicylic acid (25 $\mu$ M)  | 100                 |
|     | 5,5' Methylene disalicylic acid (100 $\mu$ M) | 87                  |
| 9   | Sanguinarine chloride (50 $\mu$ M)            | 98                  |

632

633

634

635 **Figure Legends**

636

637 **Figure 1: YegK is an atypical PP2C-like phosphatase.**

638 Amino acid sequence alignment of YegK with bacterial PP2C-like phosphatases. YegK  
639 (*Ec: Escherichia coli*) was aligned to PP2C homologs from Gram-negative bacteria using  
640 T-coffee (51) and Boxshade. Identical residues are shaded in black and similar residues  
641 are shaded in gray. The eight absolutely conserved residues found in bacterial PP2Cs are  
642 depicted with asterisks. The conserved residues absent in YegK are indicated by arrows.  
643 Signature motifs seen in most bacterial PP2Cs are denoted as roman numerals based on  
644 Shi et al. (17). The aspartic acid residue involved in metal binding is depicted with open  
645 triangle. *Te: Thermosynecococcus elongatus* tPphA; *Pa: Pseudomonas aeruginosa* Stp1;  
646 *Mx: Myxococcus xanthus* Pph1; *Se: Salmonella enterica* serovar Typhi PrpZ (aa1-260);  
647 *Ct: Chlamydia trachomatis* CTL0511 (Cp1).

648

649 **Figure 2: YegK is an active phosphatase.**

650 **(A)** Domain architecture of YegK. Metal binding site D46 is highlighted in black. **(B)**  
651 Assessment of phosphatase activity of YegK using pNPP as substrate. Reactions were  
652 performed at 37 °C for 60 mins with 350 nm of phosphatase (WT/D46N mutant), 5mM  
653 pNPP substrate in phosphatase assay buffer (20mM Tris pH 8.0 and 5mM MnCl<sub>2</sub>). **(C)**  
654 Size exclusion chromatography profile of WT and D46N YegK. His<sub>6</sub>-tagged protein  
655 (10nmol) was loaded on a Superdex 75 size exclusion column and eluted in 20mM Tris  
656 pH 8.0, 50mM NaCl, 1mM DTT, 1mM MnCl<sub>2</sub>.

657

658 **Figure 3: PphC (YegK) is a Mn<sup>2+</sup>-dependent PP2C-like phosphatase.**

659 **(A)** Metal dependency of PphC phosphatase was tested using pNPP as substrate.  
660 Reactions were carried out at 37 °C for 60 min in buffer containing 350 nM phosphatase,

661 either 5mM MgCl<sub>2</sub> or 5mM MnCl<sub>2</sub>, or both, with 5mM pNPP substrate. **(B)** Effect of Mn<sup>2+</sup>  
662 concentration on YegK catalytic activity using pNPP as a substrate. Reactions were  
663 carried out at 37 °C for 30 min in assay buffer containing 350 nM phosphatase, 5mM pNPP  
664 substrate and MnCl<sub>2</sub>.

665

666 **Figure 4: PphC phosphatase activity differs in closely related *E. coli* strains.**

667 **(A)** Genetic map of *yegK/yegl* operon from *E. coli* B strain REL606 and K strain MG1655:  
668 Thick arrows denote ORFs. The genes *yegL*, *yegK* and *yegl* encode a von Willebrand  
669 factor type A, a PP2C-like phosphatase and an eukaryotic-like Ser-Thr kinase  
670 respectively. The genes *mdtA*, *mdtB*, *mdtC* encode subunits of a multidrug efflux pump  
671 and *yegD* encodes an actin family protein. The *yegJ* gene encodes a protein of unknown  
672 function. **(B)** Amino acid sequence alignment of PphC from *E. coli* B strain REL606 and  
673 K strain MG1655. Identical residues are shaded in black and similar residues are shaded  
674 in gray. Signature motifs seen in bacterial PP2C phosphatases are depicted as Roman  
675 numerals based on (17). The aspartic acid residue involved in metal binding is conserved  
676 and indicated by open triangle. The conserved residues found in bacterial PP2Cs are  
677 depicted with arrows. **(C and D)** Enzyme kinetics of PphC. Substrate dependent activity  
678 was assessed using different concentrations of pNPP (0.1-6.4mM) in assay buffer  
679 containing 350nm phosphatase and 5mM MnCl<sub>2</sub>. Data were fitted to a Michaelis-Menten  
680 curve **(C)** and a Lineweaver-Burk plot **(D)**. The Lineweaver-Burk plot was used to  
681 determine K<sub>m</sub>, V<sub>max</sub> and K<sub>cat</sub> values **(E)**.

682

683 **Figure 5: Substrate specificity of PphC**

684 **(A)** Effect of PphC on phospho β-casein as a substrate. Dephosphorylation reactions were  
685 carried out at 37 °C for 60 min in buffer containing 50mM Tris pH 8, 10mM MnCl<sub>2</sub>, 4μg  
686 phosphorylated β-casein, 1.5μg (9μM) phosphatase. **(B)** Effect of PphC on Yegl kinase.

687 Dephosphorylation reactions were carried out at 37 °C with 2µM of phosphorylated Yegl  
688 and 4µM PphC in reaction buffer as described. Reactions were stopped at t=60mins and  
689 run on 12% SDS-PAGE followed by autoradiography. Molecular weights are denoted as  
690 kDa. **(C)** % relative <sup>32</sup>P incorporation was calculated by densitometry analysis using FIJI  
691 software. Data represents the mean +/- SE of five independent experiments. Statistical  
692 analysis used unpaired T-test ( \*\*\* P value<0.0001).

693

694 **Table 1: Effect of inhibitors on PphC phosphatase activity**

695 Reactions were carried out at 30 °C for 15 min in buffer containing 150nM phosphatase  
696 with 5mM pNPP in the presence or absence of inhibitors. Relative activity was calculated  
697 as a percentage of phosphatase activity in the presence of inhibitor versus activity in  
698 absence of inhibitor.

699

# Figure 1

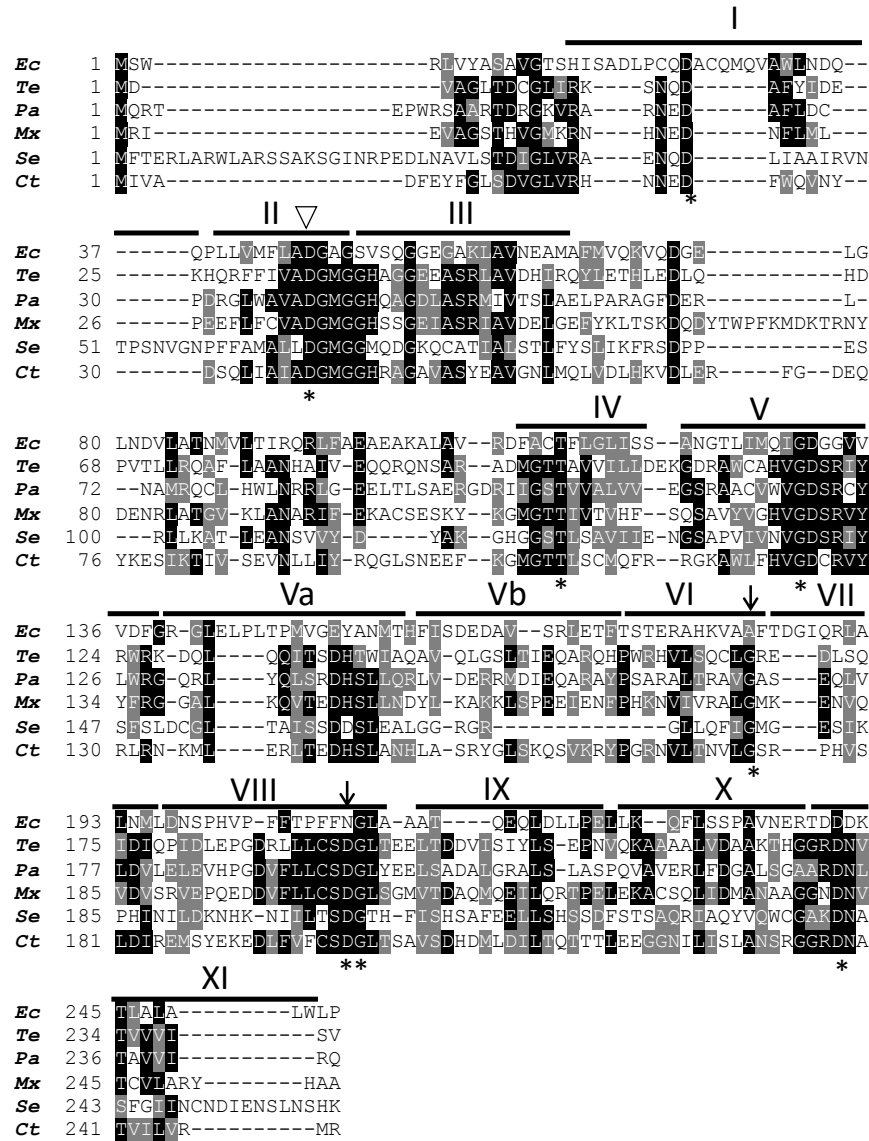



## Figure 2

A

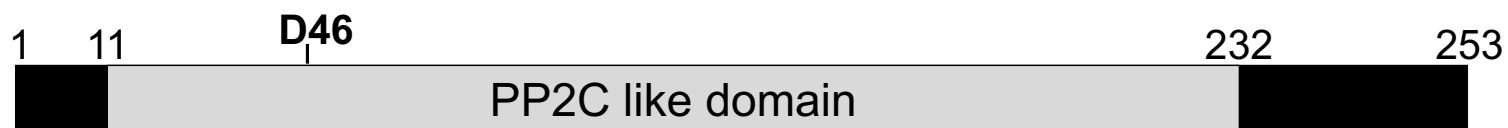

B

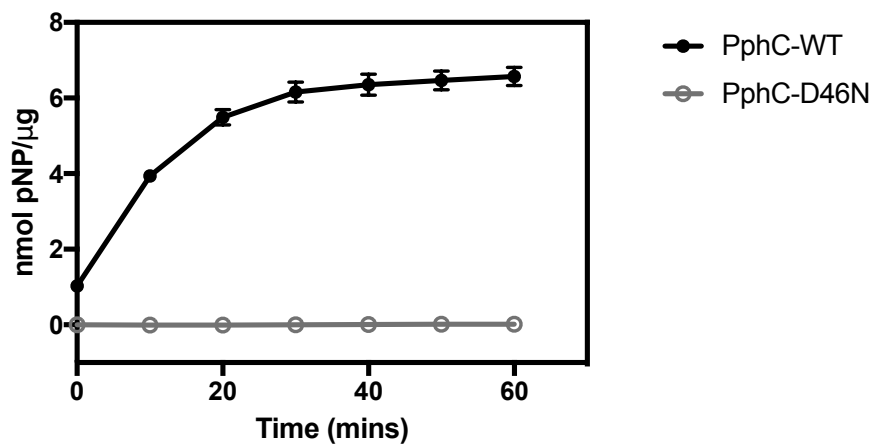

C

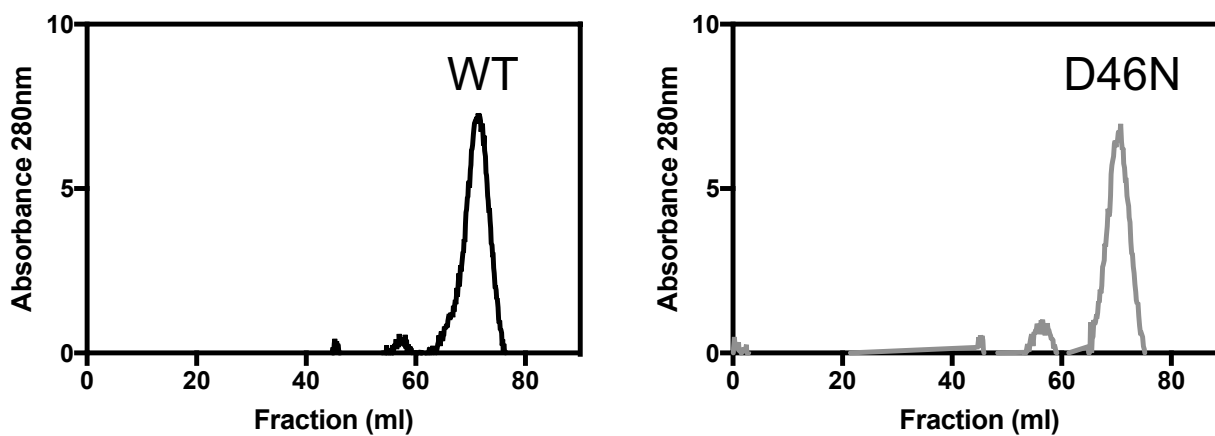

## Figure 3

A

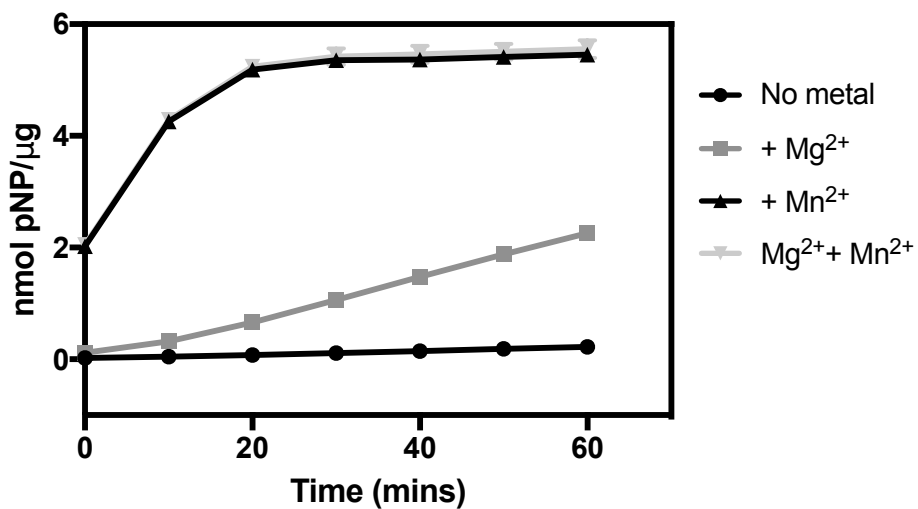

B

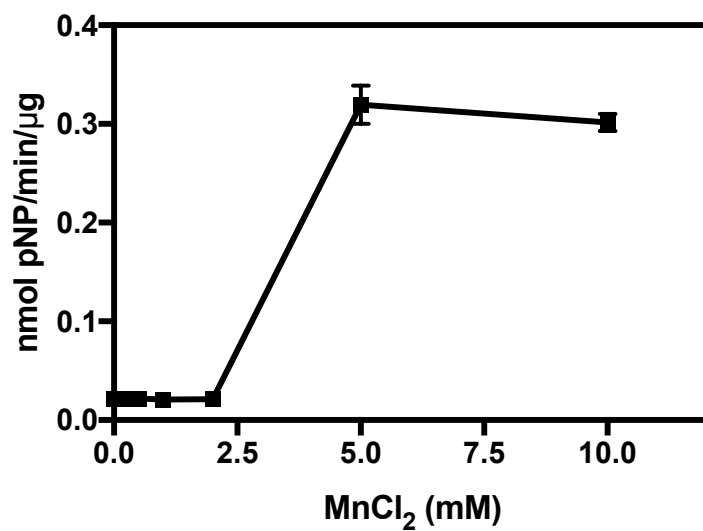

## Figure 4

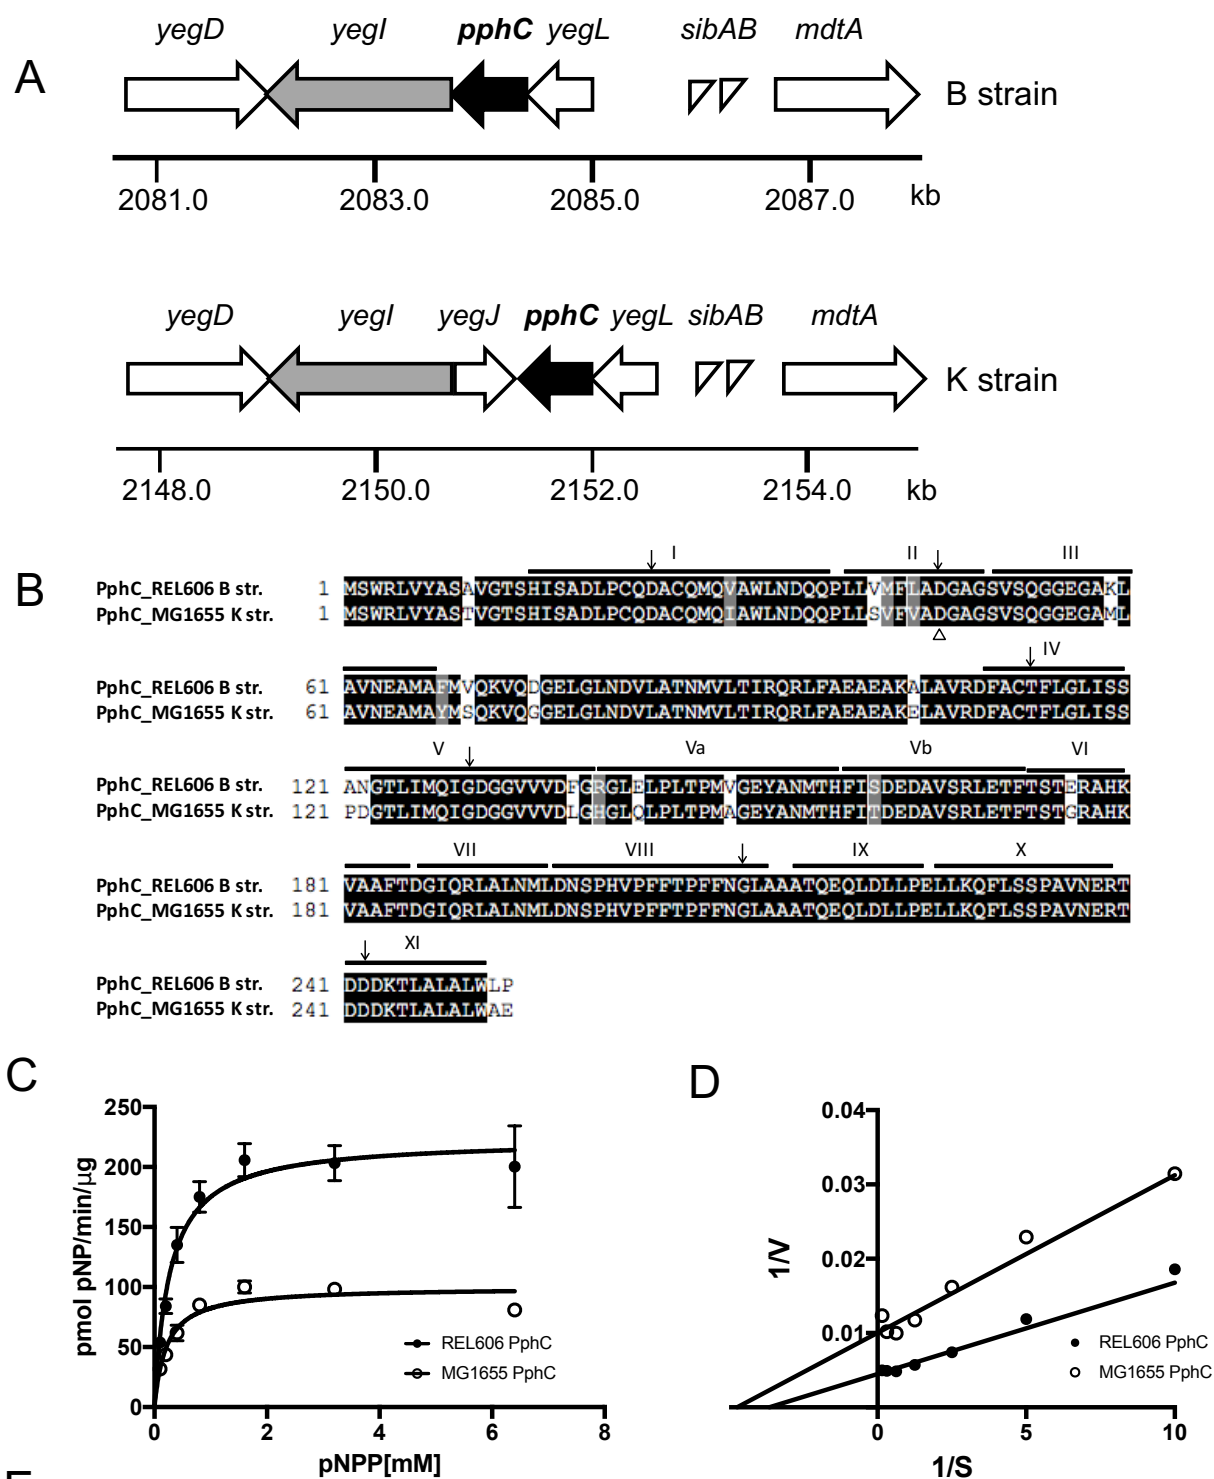

## Figure 5

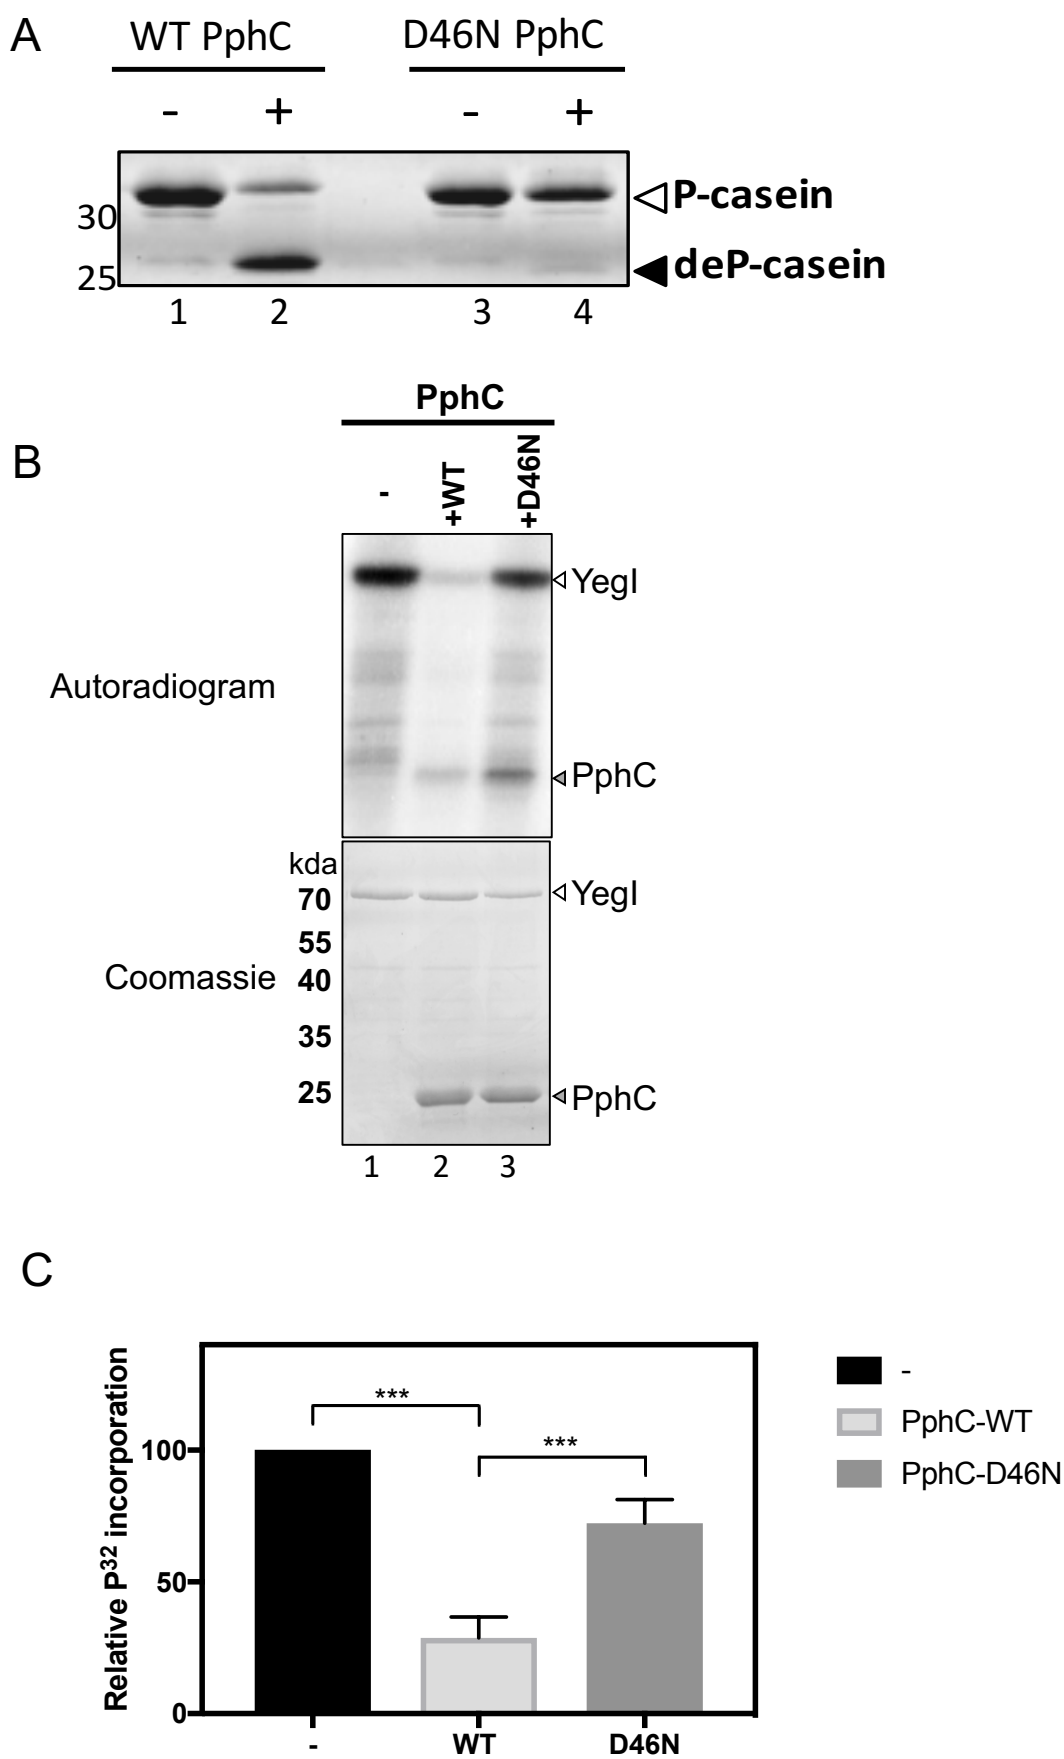

Source: https://www.biorxiv.org/content/10.1101/303594v1.full.pdf
